# Supplementary material
Source: ML conference proceedings conference paper supplement (https://openaccess.thecvf.com/content/CVPR2026/html/Sun_E-comIQ-ZH_A_Human-Aligned_CVPR_2026_paper.html)
Supplement: Supplementary file 1 [file Sun_E-comIQ-ZH_A_Human-Aligned_CVPR_2026_supplemental.pdf]

# E-comIQ-ZH: A Human-Aligned Dataset and Benchmark for Fine-Grained Evaluation of E-commerce Posters with Chain-of-Thought

## Supplementary Material

### A. Dataset: E-comIQ-18k Details

#### A.1. Source Composition and Splits

E-comIQ-18k contains 18k images drawn from six sources (See Figure 4 in Sec. 3.1). The proportions are 27.8% merchant HQ, 27.8% merchant LQ, 16.7% open-source posters, 11.1% AI-generated posters, 11.1% AI-edited posters, and 5.6% professional designs.

**Merchant originals (HQ / LQ).** We start from a large pool of merchant-provided product photos collected from real online listings. Each image is labelled by experts with a binary High Quality(HQ) / Low Quality(LQ) according to overall commercial usability, including product visibility, background cleanliness, text legibility, and layout. Then we randomly sample 5k HQ and 5k LQ images, removing obvious near-duplicates. This procedure gives a broad and realistic quality spectrum for in-the-wild merchant content.

**Open-source posters.** To increase diversity in style and category coverage, we further sample 3k posters from a public e-commerce poster dataset released in Auto-poster [4]. These images are usually complete posters with designed

**AI-generated posters.** The AI-generated subset is created from product cutouts on a white background. For each product we construct a text prompt that specifies the scene, style, and key selling points, then use GPT-4o as a text-to-image generator conditioned on the cutout as visual reference. Generation prompts and examples are provided in Fig 3, and we discard obvious failures such as missing products or unreadable text.

**AI-edited posters.** The AI-edit subset is created by a multi-stage automatic pipeline shown in Fig 1 that mimics template-based design. Given a product cutout on a white background and its category, we first retrieve a compatible scene from a predefined background library. The cutout and selected background are then jointly fed into Flux to generate a composed image with the subject placed in context. Finally, we render Chinese marketing copy into predefined text templates according to handcrafted layout rules.

**Professional designs.** The professional subset contains posters manually crafted by experienced e-commerce designers using standard design software.

For each source we compute the mean scores on Overall, Background, Object, Text, and Layout to characterise its quality profile; the statistics are reported in Fig 2.

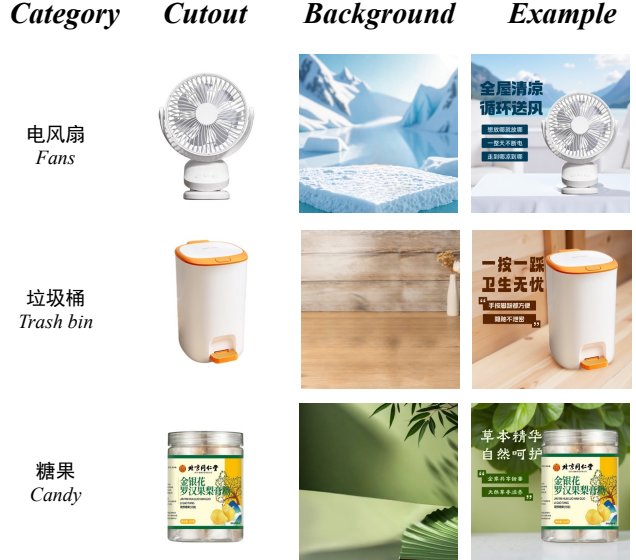

Figure 1. **AI-edited posters via Flux.** Given a product cutout and its category (left), we retrieve a matching scene from a predefined background library (middle) and feed both into Flux to compose a subject-background image. The final poster (right) is obtained by adding Chinese marketing copy using predefined text templates.

Table 1. **Train/val/test splits of E-comIQ-18k.**

| Source       | Train | Val | Test |
|--------------|-------|-----|------|
| Merchant HQ  | 4166  | 555 | 279  |
| Merchant LQ  | 4166  | 555 | 279  |
| Open-Source  | 2500  | 333 | 167  |
| AI-generated | 1666  | 222 | 112  |
| AI-edited    | 1666  | 222 | 112  |
| Prof. design | 833   | 111 | 56   |

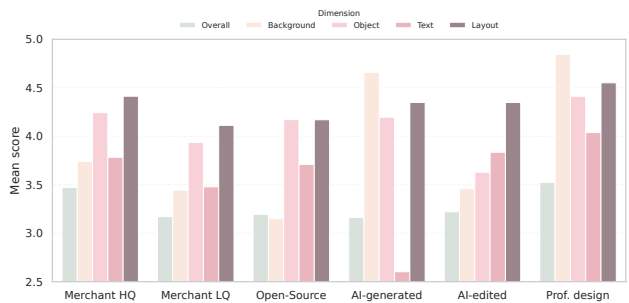

Figure 2. **Mean expert scores by source on E-comIQ-18k.**

## A.2. Annotation Checklist and Tag Taxonomy

Table 3 lists the checklist used in E-comIQ-18k. For each image, experts annotate four dimensions (Background, Object, Text, and Layout) with multi-label issue tags and a continuous score in [1.0, 5.0] (one decimal allowed). Tags mark specific defects, while scores summarise the perceived quality of that dimension. A key design choice is the separation between Object and Text. All textual elements printed on the product itself (e.g., brand names and packaging copy) are treated as part of the Object: blurry or malformed packaging text is annotated under Object and only affects the Object score. The Text dimension covers only overlaid marketing copy (titles, slogans, prices, callouts, etc.), where issues such as incorrect line breaks, irrelevant or redundant content, stroke rendering errors, missing text, overlap, or inappropriate font size are recorded. Background and Layout tags focus on global presentation (scene suitability, clutter, balance, occlusion), and an Overall score summarises the commercial usability of the poster given all dimensions.

## A.3. Annotation Interface and Reliability

For CoT rationales, we provide a dedicated human-AI collaboration view. Given the expert scores, tags, and image, Qwen-2.5-VL-Max first generates a rationale draft. In the interface, the image is shown on the left, and the model-generated paragraph is shown on the right. Annotators edit the text in a span-based NER-style manner: they can highlight spans to delete, replace them with corrected wording, or insert short additions where the explanation is incomplete; sentences that are entirely incorrect are simply struck out. All edits are recorded, and we compute a character-level edit rate in Chinese, with an average of 32.3% and a maximum of 83.39%, indicating that substantial human refinement is often required.

We further examine reliability across different quality tiers. As shown in Table 2, annotator agreement is highest in the low-quality (1.0–3.0) and high-quality (4.0–5.0) ranges, while the mid-range (3.0–4.0) posters exhibit slightly lower consistency, reflecting the inherent ambiguity of borderline cases. Nevertheless, all tiers maintain reasonably strong agreement, indicating that experts share a stable notion of quality for both clearly good and clearly bad posters.

Table 2. **Inter-annotator stability across quality tiers.** Tiers follow the score ranges (1–3 / 3–4 / 4–5) used in the main paper. Agreement rate is defined as the proportion of samples where annotators’ scores differ by no more than 0.5.

| Quality Tier (Score Range) | Agreement Rate (%) |
|----------------------------|--------------------|
| Poor (1–3)                 | 74.1               |
| Good (3–4)                 | 62.7               |
| Excellent (4–5)            | 78.4               |

Table 3. **Annotation checklist and tag taxonomy.**

| Dimension / Issue tags                                                                                                                                                                                                                                                                                                                                                                                                                                                                                                                                                                                                                                                                |
|---------------------------------------------------------------------------------------------------------------------------------------------------------------------------------------------------------------------------------------------------------------------------------------------------------------------------------------------------------------------------------------------------------------------------------------------------------------------------------------------------------------------------------------------------------------------------------------------------------------------------------------------------------------------------------------|
| <p><i>Background</i></p> <input type="checkbox"/> Color clash with product or brand;<br><input type="checkbox"/> weak scene or context;<br><input type="checkbox"/> irrelevant scene;<br><input type="checkbox"/> cluttered or noisy background;<br><input type="checkbox"/> strong “AI-generated” artefacts;<br><input type="checkbox"/> missing or broken body parts;<br><input type="checkbox"/> heavy cut-and-paste / compositing artefacts;<br>Other tags: _____;<br><b>Score:</b> _____                                                                                                                                                                                         |
| <p><i>Object</i></p> <input type="checkbox"/> Illegible or blurry text on the product packaging;<br><input type="checkbox"/> incomplete object contour (parts missing or cut off);<br><input type="checkbox"/> extra or duplicated parts (contour overgrowth);<br><input type="checkbox"/> physically implausible placement or pose;<br><input type="checkbox"/> lighting or perspective inconsistent with the scene;<br><input type="checkbox"/> unreasonable scale or proportion;<br><input type="checkbox"/> visible compositing artefacts;<br>Other tags: _____;<br><b>Score:</b> _____                                                                                           |
| <p><i>Text</i></p> <input type="checkbox"/> Incorrect or awkward line breaks;<br><input type="checkbox"/> content irrelevant to the product or promotion;<br><input type="checkbox"/> style mismatch with brand or poster tone;<br><input type="checkbox"/> stroke rendering errors;<br><input type="checkbox"/> spelling mistakes or typos;<br><input type="checkbox"/> missing expected overlaid text;<br><input type="checkbox"/> font too large;<br><input type="checkbox"/> font too small;<br><input type="checkbox"/> overlapping text (with other text or the object);<br><input type="checkbox"/> redundant or repetitive text;<br>Other tags: _____;<br><b>Score:</b> _____ |
| <p><i>Layout</i></p> <input type="checkbox"/> Overly crowded or cluttered layout;<br><input type="checkbox"/> excessive empty space;<br><input type="checkbox"/> visually unbalanced composition;<br><input type="checkbox"/> important elements occluded or mutually blocking;<br>Other tags: _____;<br><b>Score:</b> _____                                                                                                                                                                                                                                                                                                                                                          |
| <p><i>Overall</i></p> <b>Score:</b> _____                                                                                                                                                                                                                                                                                                                                                                                                                                                                                                                                                                                                                                             |

| Category                 | Title                                     | Cutout | Example | Prompt for AI-generated posters                                                                                                                                                                                                                                                                                                                                                                                                                                                                                                                                                                                                                                                                                                                                                                                                                                                                                                                                                                                                                                                                                                                                                                                                                                                                                                                                                                                                                                                                                                                                                                                                                                                                                                                                                                                                                                                                                                                                                                                                                                                                                                                                                                                                                                                                                                                                                                                                                                                                                                                                                                                                                                                                                                                                                                                                                                                                                                                                                                                                                                                                                                                                                                                                                                                                                                                                                                                                                                                                                                                                                                                                                                                                                                                                                                                                                                                                                                                                                                                                                                                                                                                                                                                                                                                                                                                                                                                                                                                                                                                                                                                                                                                                                                   |
|--------------------------|-------------------------------------------|--------|---------|-----------------------------------------------------------------------------------------------------------------------------------------------------------------------------------------------------------------------------------------------------------------------------------------------------------------------------------------------------------------------------------------------------------------------------------------------------------------------------------------------------------------------------------------------------------------------------------------------------------------------------------------------------------------------------------------------------------------------------------------------------------------------------------------------------------------------------------------------------------------------------------------------------------------------------------------------------------------------------------------------------------------------------------------------------------------------------------------------------------------------------------------------------------------------------------------------------------------------------------------------------------------------------------------------------------------------------------------------------------------------------------------------------------------------------------------------------------------------------------------------------------------------------------------------------------------------------------------------------------------------------------------------------------------------------------------------------------------------------------------------------------------------------------------------------------------------------------------------------------------------------------------------------------------------------------------------------------------------------------------------------------------------------------------------------------------------------------------------------------------------------------------------------------------------------------------------------------------------------------------------------------------------------------------------------------------------------------------------------------------------------------------------------------------------------------------------------------------------------------------------------------------------------------------------------------------------------------------------------------------------------------------------------------------------------------------------------------------------------------------------------------------------------------------------------------------------------------------------------------------------------------------------------------------------------------------------------------------------------------------------------------------------------------------------------------------------------------------------------------------------------------------------------------------------------------------------------------------------------------------------------------------------------------------------------------------------------------------------------------------------------------------------------------------------------------------------------------------------------------------------------------------------------------------------------------------------------------------------------------------------------------------------------------------------------------------------------------------------------------------------------------------------------------------------------------------------------------------------------------------------------------------------------------------------------------------------------------------------------------------------------------------------------------------------------------------------------------------------------------------------------------------------------------------------------------------------------------------------------------------------------------------------------------------------------------------------------------------------------------------------------------------------------------------------------------------------------------------------------------------------------------------------------------------------------------------------------------------------------------------------------------------------------------------------------------------------------------------------------------|
| 半宝晶石 Gemstones           | 天然原矿黄虎眼石散珠虎睛石DIY水晶珠子单颗手工编织饰品配件            |        |         | <p><b>GPT-4o PROMPT</b><br/>Based on the provided image, and incorporating the following two inputs:<br/>Product Title: {title}<br/>Product Category: {category}<br/>Automatically generate a completely e-commerce main image. The text on the product itself must be preserved with full clarity and accuracy, without any alteration. Adhere strictly to the following technical specifications:</p> <p><b>[Core Rules]</b></p> <ol style="list-style-type: none"> <li><b>Subject Preservation Mechanism (Strictly Mandatory)</b><br/>The integrity of the original product subject must be 100% preserved. All parts, details, and text physically on the product must be retained without any omission. Cropping, matting (cutting out), or occlusion of the product is forbidden. Prohibit the generation of images with white backgrounds, transparent backgrounds, or any form of an incomplete product subject. The product's scale and position in the new image must remain almost identical to the original (minor adjustments within a <math>\pm 5\%</math> tolerance are permissible).</li> <li><b>Automatic &amp; Intelligent Scene Generation</b><br/>The model must comprehensively analyze the product title {title} and category {category} to deeply understand the product's features, functions, and target audience. It must autonomously determine the most suitable background scene, environmental props, and lighting atmosphere. The design process must be adaptive and not require any manually specified scene prompts. The background must be completely reconstructed. Select environmental settings, spaces, props, and atmospheric elements (3-5 main scene elements) that are highly relevant to the product. The scene should align with one of the following contexts: typical use, product showcase, emotional connection, or innovative concept. The specific interpretation is left to the model's discretion. Implement realistic and natural environmental lighting (e.g. natural light, artificial light, or mixed lighting, selected automatically based on the product category). A clear sense of spatial perspective must be established to enhance the product's presence.</li> <li><b>Intelligent Copywriting &amp; Layout Design</b><br/>Based on the product {title} and {category}, automatically generate 1-3 highly compelling core selling points in Chinese. The copy must be concise, precise, and persuasive, addressing user pain points, target demographics, or core product value. Detect the negative space (empty areas) in the image (top, bottom, left, right) and apply professional visual typography (e.g., vertical, diagonal, or circular layouts are all acceptable). The font and color palette must adapt to the product type and its intended audience. Examples: modern and minimalist for digital products; friendly and handwritten for baby/maternity products; high-end and elegant for cosmetics; warm and cozy for home goods; traditional Chinese style for crafts. Text must have high contrast against the background to ensure it is clear and legible. Use small, appropriate icons or color blocks to enhance visual communication, but the overall design must remain clean and coordinated. The selling-point copy is only allowed in the negative space surrounding the product. It is strictly forbidden to cover the main product, its key details, or obstruct any information.</li> <li><b>Image Quality &amp; Details</b><br/>Resolution: <math>\geq 1024 \times 1024</math> pixels Clarity: Subject clarity <math>\geq 80\%</math>; background blur (bokeh) between 30%-50%. Lighting: At least two logical light sources. Shadows and light must be physically accurate. Material Integrity: The product's authentic material texture must be preserved (e.g., grain, reflections, glossiness, transparency should be rendered as in the original image).</li> </ol> <p><b>[Prohibitions]</b><br/>Do not generate images with white/transparent backgrounds, visible matting artifacts, or incomplete product subjects. Do not include background elements that are irrelevant to the product. Do not use overly complex or excessive decorative elements. Do not use illustrative, cartoonish, or abstract art styles. The output must be photorealistic.</p> <p><b>[Output Requirements]</b><br/>The product subject is fully and perfectly preserved. The background is intelligently reconstructed and highly relevant to the product's attributes. Compelling selling points are naturally integrated into the negative space, without obstructing the product. The product's scale and viewing angle are maintained.</p> |
| T恤 T-shirt               | 2件装 儿童T恤夏季短袖男童衣服薄款上衣纯棉童装宝宝夏装1-5岁          |        |         |                                                                                                                                                                                                                                                                                                                                                                                                                                                                                                                                                                                                                                                                                                                                                                                                                                                                                                                                                                                                                                                                                                                                                                                                                                                                                                                                                                                                                                                                                                                                                                                                                                                                                                                                                                                                                                                                                                                                                                                                                                                                                                                                                                                                                                                                                                                                                                                                                                                                                                                                                                                                                                                                                                                                                                                                                                                                                                                                                                                                                                                                                                                                                                                                                                                                                                                                                                                                                                                                                                                                                                                                                                                                                                                                                                                                                                                                                                                                                                                                                                                                                                                                                                                                                                                                                                                                                                                                                                                                                                                                                                                                                                                                                                                                   |
| USB驱蚊器 Mosquito repeller | 灭蚊灯驱蚊子克星室内家用电蚊器捕捉吸灭蝇宿舍餐厅饭店商用新型户外防除婴幼儿孕妇静音 |        |         |                                                                                                                                                                                                                                                                                                                                                                                                                                                                                                                                                                                                                                                                                                                                                                                                                                                                                                                                                                                                                                                                                                                                                                                                                                                                                                                                                                                                                                                                                                                                                                                                                                                                                                                                                                                                                                                                                                                                                                                                                                                                                                                                                                                                                                                                                                                                                                                                                                                                                                                                                                                                                                                                                                                                                                                                                                                                                                                                                                                                                                                                                                                                                                                                                                                                                                                                                                                                                                                                                                                                                                                                                                                                                                                                                                                                                                                                                                                                                                                                                                                                                                                                                                                                                                                                                                                                                                                                                                                                                                                                                                                                                                                                                                                                   |
| 童车 Stroller              | 溜娃神器宝宝可坐可躺轻便折叠高景观儿童遛娃婴儿小型手推车              |        |         |                                                                                                                                                                                                                                                                                                                                                                                                                                                                                                                                                                                                                                                                                                                                                                                                                                                                                                                                                                                                                                                                                                                                                                                                                                                                                                                                                                                                                                                                                                                                                                                                                                                                                                                                                                                                                                                                                                                                                                                                                                                                                                                                                                                                                                                                                                                                                                                                                                                                                                                                                                                                                                                                                                                                                                                                                                                                                                                                                                                                                                                                                                                                                                                                                                                                                                                                                                                                                                                                                                                                                                                                                                                                                                                                                                                                                                                                                                                                                                                                                                                                                                                                                                                                                                                                                                                                                                                                                                                                                                                                                                                                                                                                                                                                   |

Figure 3. Examples and prompt for the AI-generated subset. For each product we take the original category, Chinese title, and a white-background cutout (left), and use GPT-4o with the prompt template on the right to generate a complete e-commerce poster (middle). The prompt enforces strict subject preservation, automatic scene design, and Chinese selling-point copy, so that the generated posters are photorealistic and commercially usable.

| Image | CoT Rationales                                                                                                                                                                                                                                                                                                                                                                  | Translate version                                                                                                                                                                                                                                                                                                                                                                                                                                                                                                                                                                                                                                                                                                                                                                                                                                                                                                                                                                                                                                                                                                                                                                                                                                                                                                                                                                                                                                                                                                                                                                                                          |
|-------|---------------------------------------------------------------------------------------------------------------------------------------------------------------------------------------------------------------------------------------------------------------------------------------------------------------------------------------------------------------------------------|----------------------------------------------------------------------------------------------------------------------------------------------------------------------------------------------------------------------------------------------------------------------------------------------------------------------------------------------------------------------------------------------------------------------------------------------------------------------------------------------------------------------------------------------------------------------------------------------------------------------------------------------------------------------------------------------------------------------------------------------------------------------------------------------------------------------------------------------------------------------------------------------------------------------------------------------------------------------------------------------------------------------------------------------------------------------------------------------------------------------------------------------------------------------------------------------------------------------------------------------------------------------------------------------------------------------------------------------------------------------------------------------------------------------------------------------------------------------------------------------------------------------------------------------------------------------------------------------------------------------------|
|       | <p>划词题目</p> <pre> {   "背景": {     "得分": 4.80,     "原因": "背景选择非常出色。广袤的沙漠和远处的骆驼直接关联了商品“驼奶粉”的产地与原料来源，有效地构建了“新疆正宗”的场景感和信任感。背景有适度的虚化，既渲染了氛围又使商品主体突出，蓝天与黄沙的配色也十分和谐。唯一的微小可优化点是前景的沙地与商品合成的阴影可以更细腻，但总体而言，背景与应用场景匹配度极高，能有效激发消费者的购买联想。"   },   "文字": {     "得分": 1.50,     "原因": "此维度存在严重且不可忽视的错误，商品罐体上的英文“CAMEL MILK POWDER”存在明显的拼写错误，正确的应为“CAMEL”，这种低级错误会严重影响品牌专业度和消费者信任感。"   } } </pre> | <pre> "Background": {   "Score": 4.80,   "Rationale": "The background choice is excellent. The vast desert and the distant camels are directly linked to the origin and raw ingredients of the camel milk powder, effectively constructing a scene of '新疆正宗' and building trust. The background is moderately blurred, which both enriches the atmosphere and makes the product stand out, and the color combination of blue sky and yellow sand is very harmonious. The only minor improvement is that the composited shadows between the foreground sand and the product could be rendered in a more delicate way. Overall, however, the background matches the application scenario extremely well and can effectively stimulate consumers' purchase imagination." }  "Text": {   "Score": 1.50,   "Rationale": "This dimension contains a serious and cannot-be-ignored error. The English wording 'CAMEL MILK POWDER' on the product canister has an obvious spelling mistake; the correct spelling should be 'CAMEL'. Such a low-level error severely undermines the brand's professionalism and consumers' trust. The headline '新疆正宗驼奶粉' and the subheading '全家营养' are semantically smooth, highlight the key selling points, and the fonts are rendered clearly, but this single fatal spelling error is enough to drag the overall copy quality down to a failing level. This is a typical issue that must be heavily penalised during review." }  The main selling line "新疆正宗驼奶粉" is oversized, and in the secondary line "全家营养" the character "家" and the callout "净" both show text-rendering problems. </pre> |

Figure 4. Example of our CoT editing interface. Given a poster image (left), the annotator reviews the LLM-generated Chinese rationale (middle) and performs span-level edits to correct errors (shown in red/orange), producing an English translated version (right) that remains faithful to expert judgement.

## B. E-comIQ-M: Model and Training Details

### B.1. Model Configuration

We build E-comIQ-M on the Qwen2.5-VL-7B-Instruct, using the official vision encoder and tokenizer without archi-

tectural changes.

Each sample contains a single poster image and an evaluation instruction. The images are decoded as RGB



### SYSTEM PROMPT

As an expert in e-commerce image evaluation and auditing, when a user poses a question about image quality, you must first conduct a thorough reasoning and analysis process before providing the final answer. Both the reasoning process and the final answer must be enclosed in their respective specified tags: wrap the reasoning process with `<think>` tags, and wrap the final answer with `<a>` tags, as requested by the user.

### USER PROMPT

`<image>`  
Conduct a rigorous diagnostic evaluation of this product image's quality. Assess it in detail across the following four dimensions:  
**\*\*Background and Scene Consistency\*\***: Examine if the background is closely related to the product's actual use case, requiring relevant decorative elements that enhance the sense of a real-world scene and effectively stimulate consumer desire.  
**\*\*Copywriting and Text Quality\*\***: The marketing copy on the product image must be semantically coherent, clearly expressed, highlight key selling points, and be persuasive. Ensure there are no typographical errors, missing words, improper sentence breaks, or disorganized word order in the copy.  
**\*\*Object and Information Clarity\*\***: Rigorously inspect whether the product itself is complete and clear. Any phenomena such as blurriness, being out of focus, common AI-generated artifacts (e.g., deformation, ghosting, partial blurring, distortion, rough edges, unnatural material blending) are considered severe issues and will result in significant point deductions. The main object must not have indistinct contours, excessive pixel noise, blurring distortion, partial disappearance, misplacement, or abnormal fusion, which are common issues in AI-generated images.  
**\*\*Layout and Composition\*\***: Evaluate whether the overall layout is harmonious and aesthetically pleasing, with a clear hierarchy between the main product, text, and background, and no issues of occlusion, crowding, or chaotic arrangement. The placement and size of the text and the main object should be reasonable and not detract from the focus on the product. Assess the use of white space, alignment, visual center, and compositional balance, avoiding visual interference, imbalance, or elements obstructing one another.  
Strictly inspect for layout flaws such as awkward stitching, element stacking, misalignment, or inefficient use of space.  
Based on the overall performance, provide a composite score (out of 5 points), where 0-2 indicates obvious problems, 2-4 indicates minor flaws, and 4-5 indicates excellence in all aspects. Generate your response strictly in the following JSON format: `{\"background_score\": [score], \"text_score\": [score], \"object_score\": [score], \"layout_score\": [score], \"total_score\": [score]}`. The response format must be: `<think>reasoning process</think><a>final answer</a>`

Figure 6. **Instruction and prompt template for E-comIQ-M.** We use a fixed system prompt and a fixed user prompt that ask the model to first provide a `<think>` Chain-of-Thought and then output a JSON object with five scores in the `<answer>` block.

rank samples within each source by  $MSE_j$  and take the top fraction so that the final hard subset contains 3k examples with a source mix matching the original 15k set. To verify that our results are not overly sensitive to this choice, we also vary the hard-subset size from 1k to 5k and re-train GRPO. As shown in Table 4, overall PLCC and SRCC on the validation set remain stable across different sizes, with the 3k configuration achieving a slightly better balance between performance and computational cost. We therefore use 3k as the default setting in all main experiments.

### Algorithm 1 Construction of hard subset $\mathcal{D}_{\text{hard}}$ for GRPO

**Input:** Training set  $\mathcal{D}_{\text{train}} = \{(x_j, y_j, s_j)\}_{j=1}^N$ ,  
SFT model  $f_{\text{SFT}}$ ,  
target size  $K$  (here  $K = 3000$ )

**Output:** Hard subset  $\mathcal{D}_{\text{hard}}$

- 1: **Constants:**
- 2: Number of dimensions  $D = 5$  (4 sub-scores + overall)
- 3: Source set  $\mathcal{S} = \{\text{HQ, LQ, Open-Source, AI-gen., AI-edit, Prof.}\}$
- 4: Initialize per-source container  $\mathcal{B}_s \leftarrow []$  for all  $s \in \mathcal{S}$
- 5: **for**  $j = 1$  to  $N$  **do**
- 6:  $\hat{y}_j \leftarrow f_{\text{SFT}}(x_j)$  {SFT prediction}
- 7:  $e_j \leftarrow \frac{1}{D} \|\hat{y}_j - y_j\|_2^2$  {mean squared error}
- 8: Append  $(x_j, y_j, e_j)$  to  $\mathcal{B}_s$
- 9: **end for**
- 10: Compute per-source sizes  $N_s \leftarrow |\mathcal{B}_s|$  for all  $s \in \mathcal{S}$
- 11: Set  $K_s \leftarrow \left\lfloor K \cdot \frac{N_s}{\sum_{s' \in \mathcal{S}} N_{s'}} \right\rfloor$  for all  $s \in \mathcal{S}$
- 12: Initialize  $\mathcal{D}_{\text{hard}} \leftarrow \emptyset$
- 13: **for** each source  $s \in \mathcal{S}$  **do**
- 14: Sort  $\mathcal{B}_s$  in **descending** order of  $e_j$
- 15: Take the first  $K_s$  samples from  $\mathcal{B}_s$  and add them to  $\mathcal{D}_{\text{hard}}$
- 16: **end for**
- 17: **return**  $\mathcal{D}_{\text{hard}}$

## B.4. Reward Design and Ablations

As discussed in Sec. 4.2 and Table 5, combining the accuracy and distribution terms ( $R_{\text{acc}} + R_{\text{dist}}$ ) on top of SFT gives the best overall performance. Here we provide additional analysis on the reward weights and GRPO optimisation hyperparameters.

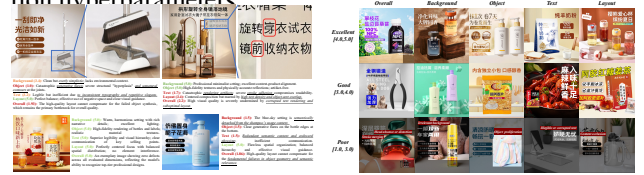

Figure 7. Additional qualitative examples.

**Reward weight sensitivity.** Figure 8 studies the effect of the accuracy tolerance  $\tau$  in  $R_{\text{acc}}$ . Very loose thresholds ( $\tau \geq 0.5$ ) make the reward less informative and lead to weaker PLCC and SRCC, while very strict thresholds ( $\tau = 0.1$ ) also hurt performance. The curves are most stable around  $\tau = 0.2$ , which we adopt as the default. Figure 9 varies the accuracy weight  $\lambda_{\text{score}}$  that balances  $R_{\text{acc}}$  and  $R_{\text{dist}}$ . Using only the accuracy term ( $\lambda_{\text{score}} = 1.0$ ) or giving it too little weight ( $\lambda_{\text{score}} \leq 0.45$ ) degrades both correlations. The best trade off is obtained near  $\lambda_{\text{score}} = 0.65$ , confirming that a moderate contribution from the distribution term helps align the geometry of sub scores with expert ratings.

**GRPO optimisation hyperparameters.** We further sweep the GRPO learning rate and KL penalty coefficient  $\beta$  (see Table 6). Very small learning rates or  $\beta$  values slow down optimisation and

Table 5. **Ablation on Q-Insight.** PLCC/SRCC (top rows) and Acc@0.5/1.0 (bottom rows). **Exp1:** SFT; **Exp2:** SFT+GRPO.

| Model | Overall     | Background  | Subject     | Text        | Layout      |
|-------|-------------|-------------|-------------|-------------|-------------|
| Exp1  | 0.297/0.319 | 0.442/0.478 | 0.242/0.244 | 0.291/0.304 | 0.379/0.391 |
| Exp2  | 0.338/0.348 | 0.459/0.496 | 0.386/0.304 | 0.320/0.342 | 0.375/0.403 |
| Exp1  | 50.8/75.2   | 63.0/81.6   | 49.4/74.4   | 43.8/67.4   | 55.2/77.8   |
| Exp2  | 53.6/79.6   | 60.2/78.4   | 51.4/74.0   | 47.2/68.4   | 57.8/77.2   |

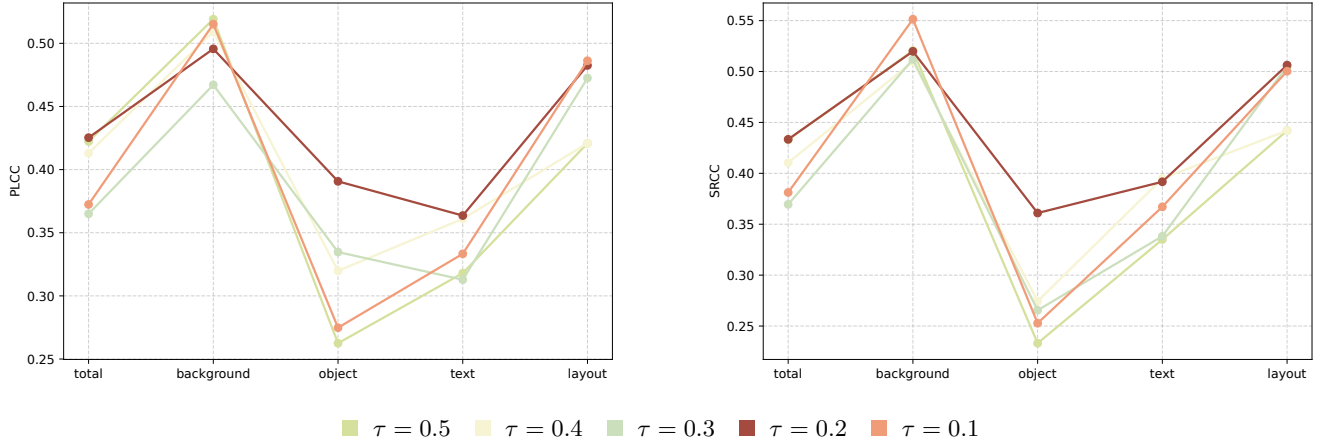

Figure 8. **Effect of the accuracy tolerance  $\tau$  on reward performance.** Left: overall PLCC across the four sub-dimensions (Background, Object, Text, Layout) and the total score under different  $\tau$  values. Right: corresponding SRCC results. Each coloured line denotes a different tolerance setting.

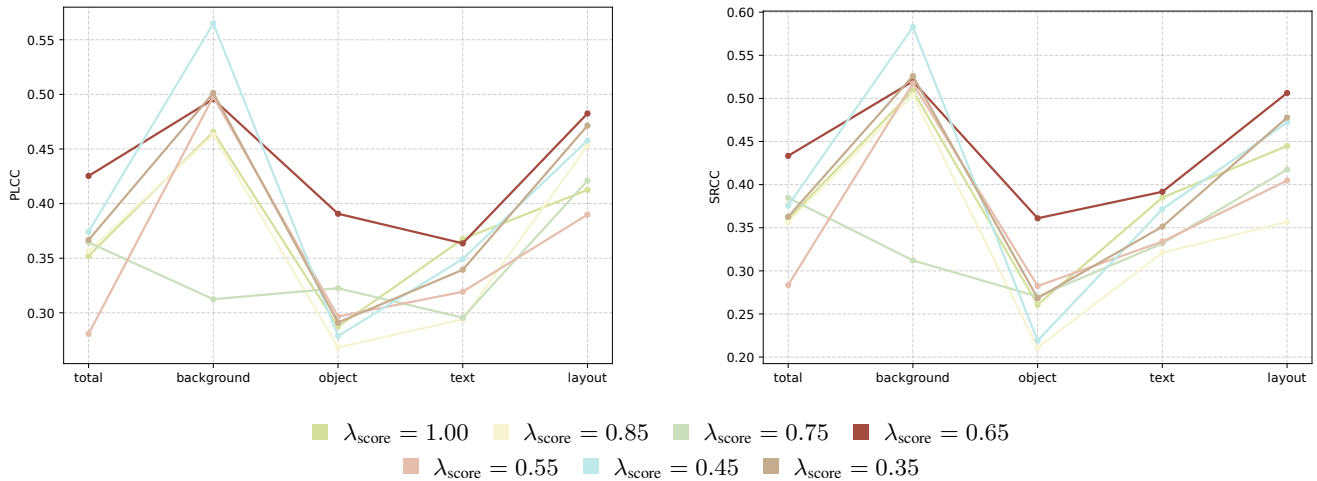

Figure 9. **Effect of the accuracy weight  $\lambda_{\text{score}}$  on reward performance.** Left: PLCC across the four sub-dimensions (Background, Object, Text, Layout) and the total score under different  $\lambda_{\text{score}}$  values. Right: corresponding SRCC results. Each coloured line denotes a different setting of the accuracy weight in the reward.

yield limited gains over SFT, while larger values lead to unstable training and a drop in PLCC/SRCC. The final setting used in the main experiments ( $\text{lr} = 1 \times 10^{-6}$ ,  $\beta = 0.1$ ) lies in a stable region and offers the best overall balance between convergence speed and evaluation performance.

## C. E-comIQ-Bench and Evaluation Toolbox

### C.1. Prompt Design and Generation Setup

The construction procedure of E-comIQ-Bench follows the design described in Sec. 5.1. Each case contains a foreground cutout,

its merchant poster, and a Chinese prompt derived from the product’s selling points. Here we provide additional implementation details regarding prompt generation and image synthesis.

**Prompt generation.** Building on Sec. 5.1, we now detail how the Chinese poster prompts are constructed. Given a product cutout, the original merchant poster, and structured product attributes (category, short title, and selling points), we first query Qwen2.5-VL-72B to generate a high-level poster prompt. To reduce prompt bias, we design five template variants covering different copywriting styles, typography rules, and layout strategies. One template is randomly selected and filled with the extracted attributes, and the model rewrites the text with improved commercial tone and layout instructions. The output is a complete “generation prompt” that will later be used to produce the final poster image.

Importantly, the template itself is *not* used for generation: it only guides the rewritings made by Qwen2.5-VL-72B. The rewritten result becomes the actual prompt supplied to different text-to-image systems (Fig. 10). Examples from seven categories are

Table 6. Effect of GRPO learning rate and KL coefficient on correlation performance. Each cell reports PLCC / SRCC on the E-comIQ-18k test set.

| Setting            |         | Overall      |              | Background   |              | Object       |              | Text         |              | Layout       |              |
|--------------------|---------|--------------|--------------|--------------|--------------|--------------|--------------|--------------|--------------|--------------|--------------|
| $lr$               | $\beta$ | PLCC         | SRCC         |
| $1 \times 10^{-6}$ | 0.10    | <b>0.425</b> | <b>0.433</b> | <b>0.496</b> | <u>0.520</u> | <b>0.391</b> | <b>0.361</b> | <b>0.364</b> | <b>0.392</b> | <b>0.483</b> | <b>0.506</b> |
| $5 \times 10^{-5}$ | 0.10    | 0.267        | 0.277        | 0.383        | 0.462        | 0.189        | 0.223        | 0.270        | 0.270        | 0.375        | 0.403        |
| $1 \times 10^{-6}$ | 0.05    | 0.329        | <u>0.348</u> | 0.441        | 0.508        | 0.263        | <u>0.239</u> | <u>0.342</u> | <u>0.346</u> | 0.431        | 0.450        |
| $5 \times 10^{-5}$ | 0.05    | 0.326        | 0.302        | 0.417        | 0.454        | <u>0.265</u> | <u>0.237</u> | 0.226        | 0.311        | <u>0.455</u> | <u>0.488</u> |
| $1 \times 10^{-6}$ | 0       | <u>0.346</u> | 0.346        | <u>0.458</u> | <b>0.530</b> | 0.272        | 0.238        | 0.272        | 0.283        | 0.390        | 0.418        |
| $5 \times 10^{-5}$ | 0       | 0.265        | 0.235        | 0.312        | 0.312        | 0.123        | 0.070        | 0.096        | 0.132        | 0.221        | 0.218        |

### Template 1

**USER PROMPT**  
Generate a single, master-level \*\*English text-to-image prompt\*\*. This prompt must guide an AI to create a flawless, 800\*800, 1:1, high-converting e-commerce product image.  
\*\*Your generated prompt MUST ensure the final image perfectly executes these Four Core Principles:\*\*  
\*\*#1. Background & Scene Relevance:\*\*  
- The background must evoke the feeling and use-case of the product ('{category}').  
- Include tasteful, relevant props/elements that enhance the scene, but maintain a clean, premium aesthetic. \*\*Avoid all distractions.\*\*  
\*\*#2. Master-Level Copywriting & Typographic Artistry (CRITICAL REFINEMENT):\*\*  
Your process is now more refined. You will decide on content and style in separate, deliberate steps.  
\*\*Step A: Critical Analysis.\*\*  
- Deeply analyze all inputs: the product, 'short title' ('{short\_title}'), 'selling points' ('{selling\_points}'), and crucially, the reference 'original image'.  
\*\*Step B: Core Copywriting Decision (Content).\*\*  
Make a judgment on the \*\*text content\*\* by choosing one of two paths:  
- \*\*PATH 1 (Adopt Content):\*\* If the original image's text is strong, your prompt will use the \*\*exact Chinese text\*\* from it.  
- \*\*PATH 2 (Innovate Content):\*\* If the original text is weak or absent, \*\*creatively generate new Chinese text\*\* (4-20 characters) using advanced structures (Poetic Slogan, Dynamic Headline/Tagline).  
\*\*Step C: Typographic Styling & Enhancement (Style - YOUR NEW KEY FOCUS):\*\*  
This is where your artistry shines. After deciding the text content in Step B, you will now design its visual style.  
- \*\*#1. Dissect the Style DNA:\*\* First, meticulously analyze the visual style of the text in the original image. Your prompt's description must be based on this analysis. Consider:  
- \*\*Font Family:\*\* Is it a Serif (衬线体), Sans-serif (无衬线体), Script (手写体)?  
- \*\*Weight & Form:\*\* Is it Bold (粗体), Light (细体), Condensed (窄体), Italic (斜体)?  
- \*\*Effects & Rendering:\*\* Does it have a Drop Shadow (投影), Outer Glow (外发光), Gradient (渐变), Emboss (浮雕), Outline (描边)?  
- \*\*Color Palette:\*\* What are the primary text colors?  
- \*\*#2. Choose the Styling Strategy:\*\* Based on your analysis, your prompt will describe one of two styling strategies:  
- \*\*Strategy A (High-Fidelity Enhancement):\*\* If the original style is good, your prompt will describe a \*\*premium, high-fidelity recreation\*\* of it. This means using the same core style but making it sharper, cleaner, and more perfectly rendered. For example, your prompt might say, "recreating the original's bold sans-serif style but with flawless vector-quality rendering and a more subtle, realistic soft drop shadow."  
- \*\*Strategy B (Creative Evolution):\*\* If the original style is basic or can be improved, your prompt will describe a \*\*creative evolution inspired by the original\*\*. This means retaining the original's spirit but elevating it. For example, your prompt might say, "evolving the original's simple white text by rendering it in a modern, light-weight sans-serif font, and adding a gentle, clean neon glow that matches the product's high-tech aesthetic."  
- \*\*#3. Specify Dynamic Layout:\*\* Even when adopting a style, ensure the layout is dynamic. Your prompt should describe a sophisticated arrangement, emphasizing "hierarchy through varied font sizes and weights", and using intelligent placement (e.g., "a large impactful headline with a smaller tagline nested below it").  
\*\*Step D: Universal Quality Mandate\*\*  
Regardless of the path taken, the prompt MUST demand \*\*Zero-Tolerance Quality Control\*\* for all text. Use phrases like: 'Flawless, vector-quality Chinese typography with perfect anti-aliasing. Absolutely no artifacts, pixelation, missing strokes, smudging, or character distortion.'  
\*\*#3. Product Subject & Information Clarity:\*\*  
- The product must be depicted with \*\*hyper-realistic detail and perfect lighting\*\*.  
- Your prompt must explicitly forbid AI flaws: \*\*no blur, distortion, warping, ghosting, unrealistic textures, or unnatural blending\*\*.  
\*\*#4. Overall Composition & Balance:\*\*  
- The prompt must describe a composition that is balanced, harmonious, and professional, with ample negative space.  
\*\*Final Output Requirement:\*\*  
- Output ONLY the final, complete English prompt text.  
- Do not include any commentary. Be direct and professional.

### Template 2

**USER PROMPT**  
Generate a single, master-level \*\*English text-to-image prompt\*\*. This prompt will be used by an AI to create a stunning, 800\*800, 1:1, high-converting e-commerce product image.  
\*\*Your generated prompt MUST ensure the final image perfectly executes these Four Core Principles:\*\*  
\*\*#1. Background & Scene Relevance:\*\*  
- The background must evoke the feeling and use-case of the product ('{category}').  
- Include tasteful, relevant props/elements that enhance the scene, but maintain a clean, premium aesthetic. \*\*Avoid all distractions.\*\*  
\*\*#2. Master-Level Copywriting & Typographic Artistry (WITH CONDITIONAL LOGIC):\*\*  
This is your most critical task. You must first evaluate the provided materials and then choose the best creative path.  
\*\*Step A: Critical Analysis & Evaluation.\*\*  
- Deeply analyze all inputs: the product itself, the 'short title' ('{short\_title}'), the core 'selling points' ('{selling\_points}'), and most importantly, \*\*the text content, layout, and design quality within the reference 'original image'\*\*.  
\*\*Step B: The Core Creative Decision & Action.\*\*  
You must now make a critical judgment and choose one of the following two paths:  
- \*\*--- PATH 1 (PRIORITY): Adopt & Refine ---\*\*  
\*\*Choose this path IF\*\* the reference 'original image' already contains well-designed, clear, and compelling Chinese selling points. Your main task is to leverage this existing success. Your generated prompt will then describe:  
- \*\*#1. Text Content:\*\* Explicitly state that the prompt should use the \*\*exact Chinese text from the original image\*\*.  
- \*\*#2. Layout & Composition:\*\* Describe a layout that \*\*respects and enhances the original composition\*\*. Your prompt should guide the AI to perfect the alignment, spacing, and visual balance of the existing text layout.  
- \*\*#3. Rendering Quality:\*\* Specify font styles and supreme rendering quality to make the 'existing' text look even more premium and flawless than in the reference.  
- \*\*--- PATH 2 (FALLBACK): Create & Innovate ---\*\*  
\*\*Choose this path IF\*\* the reference image has minimal, poor, badly rendered, or no text at all. You must then take full creative control. Your generated prompt will describe:  
- \*\*#1. Text Content:\*\* Creatively generate new Chinese text (total 4-20 characters) by synthesizing all inputs. Use advanced structures like a Poetic Slogan or a Dynamic Headline/Tagline.  
- \*\*#2. Layout & Composition:\*\* Design a \*\*completely new, dynamic typographic layout\*\*. Use concepts like font size interplay, vertical stacking, perspective integration, or text wrapping to create visual excitement.  
- \*\*#3. Font & Style:\*\* Apply \*\*From Psychology\*\*, choosing a font that matches the product's personality (e.g., 'clean sans-serif for tech', 'elegant serif for luxury') and describe it clearly.  
\*\*Step C: Universal Quality Mandate.\*\*  
Regardless of which path you take, the prompt MUST demand \*\*Zero-Tolerance Quality Control\*\* for all text. Use phrases like: 'Flawless, vector-quality Chinese typography with perfect anti-aliasing. Absolutely no artifacts, pixelation, missing strokes, smudging, or character distortion.'  
\*\*#3. Product Subject & Information Clarity:\*\*  
- The product must be depicted with \*\*hyper-realistic detail and perfect lighting\*\*.  
- Your prompt must explicitly forbid AI flaws: \*\*no blur, distortion, warping, ghosting, unrealistic textures, or unnatural blending\*\*.  
\*\*#4. Overall Composition & Balance:\*\*  
- The prompt must describe a composition that is balanced, harmonious, and professional.  
- If Path 1 was chosen, this means perfecting the original's balance. If Path 2, it means creating a new, compelling balance. Ensure ample negative space.  
\*\*Final Output Requirement:\*\*  
- Output ONLY the final, complete English prompt text.  
- Do not include any commentary. Be direct and professional.  
- Your final prompt should be a masterpiece of detail and creative direction, reflecting your chosen path.

Figure 10. Prompt templates for generating Chinese e-commerce poster instructions. We provide the white-background cutout, the original merchant poster, and structured attributes (category, short title, and selling points) to Qwen2.5-VL-72B. The model rewrites the information into a professional, stylistic generation prompt that follows detailed typography, layout, and text-quality constraints. Five templates are used to encourage stylistic diversity.

shown in Fig. 11 and Fig. 12.

**Generation setup.** All text-to-image models are queried with a unified image resolution of  $800 \times 800$  pixels, and all models support both Chinese and English prompts without requiring language-specific templates. We evaluate a mixture of commercial and open-source systems, including Seedream 4.0 [6], GPT-4o [?], Gemini-2.5-Flash-Image [1], Flux-Kontext-max [3], and the open-source Qwen-Image-Edit [7]. Commercial models are accessed through official HTTP APIs, whereas Qwen-Image-Edit is executed locally via the official SDK. For all models, we follow their default inference settings (e.g., sampling steps and classifier-free guidance), because our benchmark focuses on cross-model stylistic controllability rather than model-specific tuning. A uni-

fied robustness policy is used across systems: if one query fails due to network or decoding errors, we automatically retry the same request up to three times. Only successful generations are kept as final benchmark samples.

## C.2. Automatic Evaluation Toolbox

E-comIQ-Bench evaluates each generated poster along the same four quality dimensions as human annotation (Background, Object, Text, Layout) plus the overall score. Human evaluation and our proposed E-comIQ-M serve as the two reference metrics. In addition, two auxiliary indicators are used to measure structural correctness: object consistency and text accuracy.

**Object consistency.** Given a cutout, we measure how well the

### Daily Tools

Create a flawless, 800x800, 1:1 high-converting e-commerce product image for '山茶花洗' laundry detergent. The background should evoke the feeling of freshness and cleanliness with soft, natural elements like blooming camellia flowers and gentle sunlight filtering through leaves, ensuring a clean, premium aesthetic without distractions. Include tasteful props such as neatly folded white linens to enhance the scene. For the typography, adopt the exact Chinese text from the original image: "山茶花精油加倍留香", "山茶花香洗衣液", "健康不添加", "净含量: 2kg.", "官方正品", "山茶花香持久留香", and "大师级香氛体验". Refine the original text style: it uses a bold sans-serif font with a gradient effect and drop shadow. Recreate this style with flawless vector-quality rendering, enhancing the gradient for a more vibrant look and adjusting the drop shadow for a subtle, realistic effect. Ensure a dynamic layout with varied font sizes and weights, placing the large impactful headline at the top left and smaller taglines below it. The product must be depicted with hyper-realistic detail and perfect lighting, showcasing its transparent packaging with visible floral patterns and clear liquid inside. Absolutely no blur, distortion, warping, ghosting, unrealistic textures, or unnatural blending is allowed. The composition should be balanced and harmonious, with ample negative space around the product and text, ensuring clarity and professionalism. Demand zero-tolerance quality control for the Chinese typography, ensuring perfect anti-aliasing and no artifacts, pixelation, missing strokes, smudging, or character distortion.

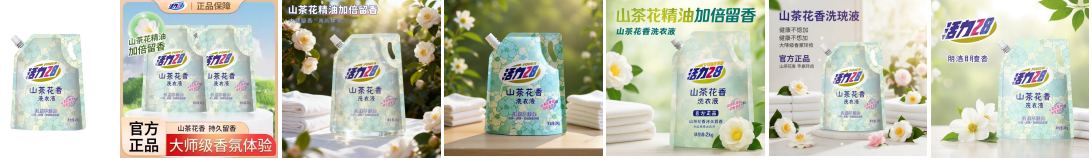

### Home Living

Create an 800x800, 1:1 photorealistic image of a high-quality ceramic pig fat container with a stainless steel strainer. The background should be a clean, modern kitchen countertop with tasteful props such as a bowl of ingredients and cooking utensils to enhance the scene's relevance to food preparation. Ensure the product is depicted with absolute clarity, avoiding any blur, distortion, warping, ghosting, unrealistic textures, misshapen parts, or unnatural blending. The main selling point text should be creatively generated in Chinese, emphasizing the product's heat resistance and ease of cleaning. Use a parallel structure for the slogan: "耐高温, 易清洗, 家用必备, 健康无忧". This text should be rendered using a modern bold sans-serif font, ultra-crisp and perfectly legible Chinese characters with no missing strokes, no character smudging, no blurry edges, no typos, no artifacts, and no garbled text. The color should be a contrasting yet harmonious shade that stands out against the background. Place the main headline "耐高温, 易清洗" prominently in the upper-right corner of the image, ensuring it complements the product without obstructing it. Below the headline, add the supporting tagline "家用必备, 健康无忧" in a slightly smaller font size, maintaining a clear information hierarchy. Both texts should be subtly integrated into the composition, utilizing negative space to create a clean, high-end feel. Ensure the overall layout is balanced and aesthetically pleasing, with a professional composition that highlights the product's features and benefits. The image should stimulate purchase intent while keeping the focus on the ceramic pig fat container, presented in a white background shot with sharp, readable logos and text on the product itself.

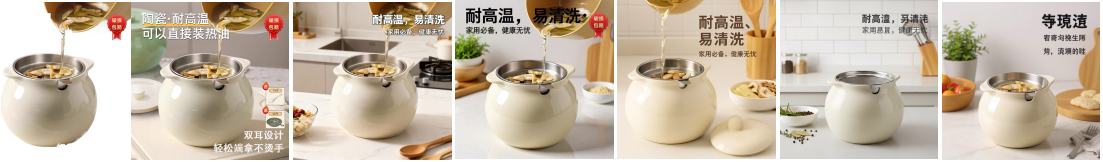

### 3C Accessories

Create a flawless, 800x800, 1:1 high-converting e-commerce product image of a projector with the following specifications: **Background & Scene Relevancy:** The background should evoke a modern, tech-savvy environment where the projector is used. Include tasteful elements like a sleek desk or a minimalist room setup that enhances the scene without distracting from the product. Maintain a clean, premium aesthetic. **Master-Level Copywriting & Typographic Artistry:** **Content:** Adopt the content from the original image: "白天4K特清特亮" and "无需幕布". **Style:** Dissect the style DNA of the original text. It uses a bold sans-serif font with a strong weight and form. The text has a drop shadow effect for depth and is primarily in black with some red highlights. **Styling Strategy:** Choose Strategy A (High-Fidelity Enhancement). Recreate the original's bold sans-serif style but with flawless vector-quality rendering and a more subtle, realistic soft drop shadow. Ensure the color palette remains consistent with black as the primary color and red for emphasis. **Dynamic Layout:** Arrange the text dynamically with a large impactful headline "白天4K特清特亮" and a smaller tagline "无需幕布" nestled below it. Use varied font sizes and weights to emphasize hierarchy. **Product Subject & Information Clarity:** Depict the projector with hyper-realistic detail and perfect lighting. Ensure there are no blur, distortion, warping, ghosting, unrealistic textures, or unnatural blending. The projector should be shown in a way that highlights its key features clearly. **Overall Composition & Balance:** Design a balanced, harmonious, and professional composition with ample negative space. The projector should be the focal point, with the text and background elements supporting its prominence. **Universal Quality Mandate:** Demand zero-tolerance quality control. Ensure flawless, vector-quality Chinese typography with perfect anti-aliasing. Absolutely no artifacts, pixelation, missing strokes, smudging, or character distortion.

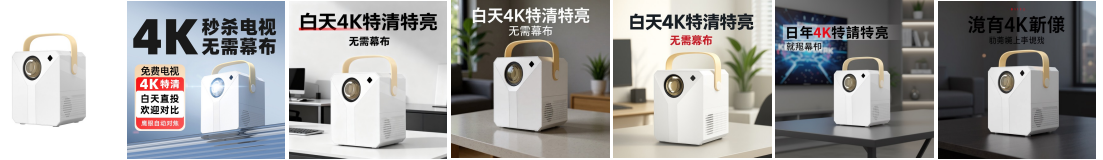

### Pet & Toys

Create an 800x800, high-converting e-commerce product image for '火山石水草鱼缸造景' with the following specifications: **Background & Scene Relevancy:** A serene underwater scene featuring clear water and smooth pebbles at the bottom. The background subtly suggests a natural aquatic environment, enhancing the use-case of the product. Include tasteful elements like small fish swimming in the background to add life without distracting from the main subject. **Master-Level Copywriting & Typographic Artistry:** **Adopt & Refine Path: 1.** Text Content: Use the exact Chinese text from the original image: "新手定植水草大全" and "草场直发 天然净水 无需底砂 入缸成景". **2.** Layout & Composition: Respect and enhance the original composition by maintaining the central placement of the text. Ensure perfect alignment and spacing, with the main title "新手定植水草大全" prominently displayed at the top center, and the subtitle "草场直发 天然净水 无需底砂 入缸成景" just below it. Adjust the font size slightly for better visual balance. **3.** Rendering Quality: Employ flawless, vector-quality Chinese typography with perfect anti-aliasing. Choose a bold sans-serif font for the main title and a clean, elegant serif font for the subtitle. Ensure supreme rendering quality, with absolutely no artifacts, pixelation, missing strokes, smudging, or character distortion. **Product Subject & Information Clarity:** Depict the six types of water plants with hyper-realistic detail and perfect lighting. Each plant should be shown in its volcanic stone base, with vibrant green leaves and natural textures. Eliminate any AI flaws such as blur, distortion, warping, ghosting, unrealistic textures, or unnatural blending.

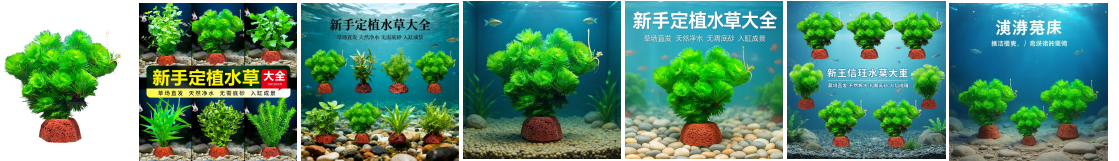

Cutout Original Seedream Qwen GPT-4o Gemini Flux

Figure 11. Prompt-generation showcase across product categories (1/2). For each cutout-prompt pair, several commercial systems and research models are queried to generate one poster per model. The merchant poster is shown as the human-designed reference. Categories on this page include Daily Tools, Home Living, and 3C Accessories.

generated poster preserves the true object identity. We first use DINOv2 [5] to detect the target category in the poster and obtain the corresponding bounding region, then apply SAM-HQ [2] followed

by Vitmatte [8] to obtain a refined object mask. The extracted object region is compared against the original cutout using DINO feature cosine similarity, CLIP image embedding cosine similar-

## Fresh Food

Create an 800x800, 1:1 photorealistic e-commerce product image featuring Northeastern White Glutinous Corn (东北白糯玉米). The background should be a clean, rustic kitchen setting with elements like a wooden cutting board and fresh green herbs to emphasize the natural and healthy aspect of the corn. Ensure the scene is tastefully arranged without clutter, keeping the focus on the corn. For the text, analyze the reference image's existing text which highlights freshness, healthiness, and vacuum sealing. Synthesize this into a compelling new Chinese selling point using a Primary/Secondary Structure: Main Headline: "东北白糯, 真空锁鲜" (Northeastern White Glutinous, Vacuum Sealed for Freshness) Subheadline: "颗颗Q弹, 皮薄肉嫩, 健康美味" (Each Kernel Bouncy, Thin Skin Tender Flesh, Healthy and Delicious) The text should use a modern bold sans-serif font in black for the main headline and a slightly lighter shade for the subheadline. Ensure ultra-crisp and perfectly legible Chinese characters with no missing strokes, no character smudging, no blurry edges, no typos, no artifacts, or garbled text. The corn must be depicted with absolute photorealism and clarity, avoiding any blur, distortion, warping, ghosting, unrealistic textures, misshapen parts, or unnatural blending. Logos or text on the product itself must be sharp and readable. Place the newly generated Chinese text thoughtfully in the upper-right corner, complementing the product without obstructing or overwhelming it. Use negative space effectively to create a clean, high-end feel. The composition should be balanced, professional, and aesthetically pleasing, with a clear visual hierarchy that draws attention to both the product and the text.

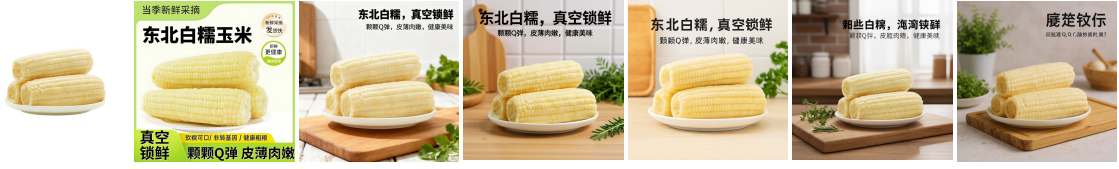

## Daily Tools

Create a flawless, 800x800, 1:1 high-converting e-commerce product image of a "全铜增压龙头" (full copper pressure-boosting faucet) with the following specifications: \*\*Background & Scene Relevancy:\*\* The background should evoke a clean, modern kitchen setting, emphasizing the faucet's use-case. Include tasteful elements like a stainless steel sink and fresh produce to enhance the scene while maintaining a premium, uncluttered aesthetic. \*\*Master-Level Copywriting & Typographic Artistry:\*\* - \*\*Content:\*\* Adopt the original Chinese text "清洁无死角" and "加长延伸" due to its strength and relevance. - \*\*Style:\*\* Dissect the style DNA from the original image: - \*\*Font Family:\*\* Sans-serif (无衬线体). - \*\*Weight & Form:\*\* Bold (粗体). - \*\*Effects & Rendering:\*\* Drop Shadow (投影), Gradient (渐变). - \*\*Color Palette:\*\* Primary colors are white text on green and red backgrounds. - \*\*Styling Strategy:\*\* High-Fidelity Enhancement. Recreate the bold sans-serif style with flawless vector-quality rendering, enhancing the drop shadow for a more realistic effect. Ensure the gradient is smooth and visually appealing. - \*\*Dynamic Layout:\*\* Arrange the text dynamically with a large, impactful headline "清洁无死角" at the top left in a bold white font on a green background, followed by a smaller tagline "加长延伸" below it in a bold white font on a red background. Place "全铜三档防溅神器" prominently at the bottom in a bold white font on a dark green background. \*\*Product Subject & Information Clarity:\*\* Depict the faucet with hyper-realistic detail and perfect lighting. Show the water flow clearly to demonstrate functionality. Ensure there are no AI flaws such as blur, distortion, warping, ghosting, unrealistic textures, or unnatural blending. \*\*Overall Composition & Balance:\*\* Design a balanced, harmonious composition with ample negative space. The product should be the focal point, with the text supporting its features effectively. Demand zero-tolerance quality control: flawless, vector-quality Chinese typography with perfect anti-aliasing. Absolutely no artifacts, pixelation, missing strokes, smudging, or character distortion.

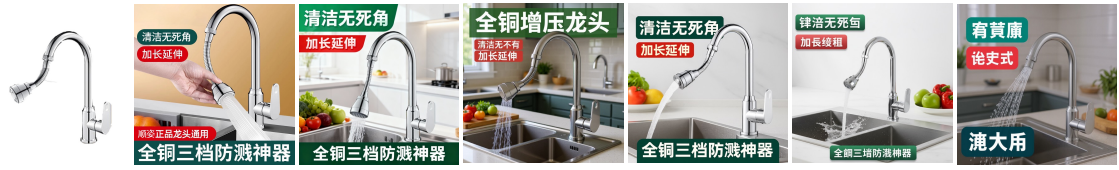

## Footwear & Apparel

Create an 800x800, high-converting e-commerce product image for a sweet hair accessory (甜妹发圈) with the following specifications: \*\*Background & Scene Relevancy:\*\* Set the scene in a soft, pastel-colored room with a wooden desk and a few tasteful props like a stack of books and a pair of glasses to evoke a cozy, everyday use-case. Ensure the background is clean and uncluttered. \*\*Master-Level Copywriting & Typographic Artistry:\*\* - \*\*Path 2 (Create & Innovate):\*\* Generate new Chinese text that reads "高弹不伤发, 甜美随心" (High elasticity, no damage to hair, sweet as you wish). Design a dynamic typographic layout with vertical stacking and perspective integration. Use a playful yet elegant serif font that matches the product's personality. - \*\*Layout & Composition:\*\* Place the text on the right side of the image, slightly angled for visual excitement. Ensure perfect alignment, spacing, and balance. - \*\*Rendering Quality:\*\* Demand flawless, vector-quality Chinese typography with perfect anti-aliasing. Absolutely no artifacts, pixelation, missing strokes, smudging, or character distortion. \*\*Product Subject & Information Clarity:\*\* Depict the hair accessory with hyper-realistic detail and perfect lighting. Show it being held gently in a hand, highlighting its texture and design. Forbid any AI flaws such as blur, distortion, warping, ghosting, unrealistic textures, or unnatural blending. \*\*Overall Composition & Balance:\*\* Create a balanced and harmonious composition with ample negative space. The product should be the focal point, with the text complementing it seamlessly. Ensure the image is professional and visually appealing. The final image must be a masterpiece of detail and creative direction, perfectly executing all four core principles.

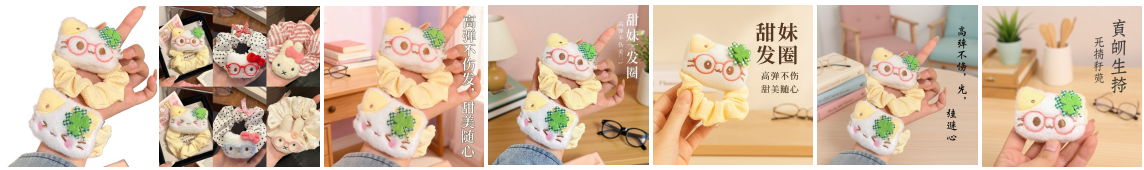

Cutout Original Seedream Qwen GPT-4o Gemini Flux

Figure 12. Prompt-generation showcase across product categories (2/2). The same protocol applies to the remaining categories: Fresh Food, Daily Tools (additional cases), Footwear & Apparel, and Pet & Toys.

ity, and LPIPS perceptual distance. These metrics quantify semantic consistency (DINO/CLIP) and pixel-level fidelity (LPIPS) between the generated image and the ground-truth product.

**Text accuracy.** Unlike object text on the product packaging (assessed in the Object dimension), this metric evaluates whether the generated marketing copy faithfully reflects the intended prompt semantics. We train a lightweight text extractor to obtain structured selling-point keywords from each poster, and compare them to the prompt using two levels of textual matching: (1) Sentence-level structural accuracy measured by F1 over detected key phrases (Phrase F1). (2) Character-level normalised Levenshtein similarity computed as the Bag-of-Characters cosine similarity (Char Sim), which ignores ordering but enforces semantic token agreement. This combination penalises both missing key information and hal-

lucinated claims.

**Reproducibility.** All metrics are implemented in our evaluation toolbox, which will be released together with the dataset. To ensure fairness and stability, the toolbox retries API failures up to three times and outputs merged JSON statistics per model. The snippet below illustrates the text-matching aggregation used in the benchmark.

## References

- [1] Alisa Fortin, Guillaume Vernade, Kat Kampf, and Ammaar Reshi. Introducing gemini 2.5 flash image, our state-of-the-art image model. *Google Developers Blog*, 26, 2025. 7
- [2] Lei Ke, Mingqiao Ye, Martin Danelljan, Yu-Wing Tai, Chi-

- Keung Tang, Fisher Yu, et al. Segment anything in high quality. *Advances in Neural Information Processing Systems*, 36: 29914–29934, 2023. [8](#)
- [3] Black Forest Labs, Stephen Batifol, Andreas Blattmann, Frederic Boesel, Saksham Consul, Cyril Diagne, Tim Dockhorn, Jack English, Zion English, Patrick Esser, Sumith Kulal, Kyle Lacey, Yam Levi, Cheng Li, Dominik Lorenz, Jonas Müller, Dustin Podell, Robin Rombach, Harry Saini, Axel Sauer, and Luke Smith. Flux.1 kontext: Flow matching for in-context image generation and editing in latent space, 2025. [7](#)
- [4] Jinpeng Lin, Min Zhou, Ye Ma, Yifan Gao, Chenxi Fei, Yangjian Chen, Zhang Yu, and Tiezheng Ge. Autoposter: A highly automatic and content-aware design system for advertising poster generation. In *Proceedings of the 31st ACM International Conference on Multimedia*, pages 1250–1260, 2023. [1](#)
- [5] Maxime Oquab, Timothée Darcet, Théo Moutakanni, Huy Vo, Marc Szafraniec, Vasil Khalidov, Pierre Fernandez, Daniel Haziza, Francisco Massa, Alaaeldin El-Nouby, et al. Dinov2: Learning robust visual features without supervision. *Transactions on Machine Learning Research Journal*, 2024. [8](#)
- [6] Team Seedream, Yunpeng Chen, Yu Gao, Lixue Gong, Meng Guo, Qiushan Guo, Zhiyao Guo, Xiaoxia Hou, Weilin Huang, Yixuan Huang, et al. Seedream 4.0: Toward next-generation multimodal image generation. *arXiv preprint arXiv:2509.20427*, 2025. [7](#)
- [7] Chenfei Wu, Jiahao Li, Jingren Zhou, Junyang Lin, Kaiyuan Gao, Kun Yan, Sheng-ming Yin, Shuai Bai, Xiao Xu, Yilei Chen, et al. Qwen-image technical report. *arXiv preprint arXiv:2508.02324*, 2025. [7](#)
- [8] Jingfeng Yao, Xinggang Wang, Shusheng Yang, and Baoyuan Wang. Vitmatte: Boosting image matting with pre-trained plain vision transformers. *Information Fusion*, 103:102091, 2024. [8](#)
